# Supplementary material
Source: MDPI journal article supplement (https://www.mdpi.com/2571-550X/1/3/20)
Supplement: s1 [file s1]

Archive with 2 entries (2 files):
- Supplementary/Supplementary Materials.pdf
- Supplementary/Supplementary TableS1.csv
